# Supplementary material for: Identification of a TLR-Induced Four-lncRNA Signature as a Novel Prognostic Biomarker in Esophageal Carcinoma
Source: Front Cell Dev Biol. 2020 Jul 21;8:649. doi: 10.3389/fcell.2020.00649 (PMC7396588; doi:10.3389/fcell.2020.00649)
Supplement: TABLE S1 — Lists of differentially expressed lncRNAs between 179 paired ESCA patients and normal tissues. [file Table_1.XLSX]

## Sheet: Differentially expressed lncRNA
lncRNA	logFC	FDRadjusted p-value
ENSG00000224958	-2.97694	4.25954e-100
ENSG00000231789	-4.35413	5.40505e-89
ENSG00000196634	-4.00874	2.85724e-88
ENSG00000230838	4.95703	5.384e-86
ENSG00000271127	3.3271	3.02117e-85
ENSG00000250889	-2.95949	1.70719e-81
ENSG00000223914	-4.84959	3.43359e-81
ENSG00000225670	-2.52439	3.56901e-79
ENSG00000254192	1.66219	2.02258e-77
ENSG00000267284	2.60059	6.72799e-77
ENSG00000235097	-2.42868	7.75818e-77
ENSG00000249395	4.64891	8.59693e-77
ENSG00000206195	2.6134	1.60209e-76
ENSG00000235710	-2.73244	3.52556e-76
ENSG00000197301	3.65102	4.18933e-76
ENSG00000203688	-4.18876	6.55529e-76
ENSG00000250073	-1.77361	3.1896e-74
ENSG00000236289	-3.59033	3.65747e-74
ENSG00000224271	2.35368	1.44713e-73
ENSG00000269186	-3.1124	2.07502e-72
ENSG00000253105	-2.55825	2.21643e-71
ENSG00000228126	-3.4446	2.34192e-71
ENSG00000241158	-3.67819	4.46573e-71
ENSG00000232529	-2.33421	5.57776e-71
ENSG00000226510	-2.61718	6.57153e-71
ENSG00000270607	-2.06859	6.94088e-71
ENSG00000236200	1.63488	1.59721e-69
ENSG00000236651	-2.36098	3.37004e-69
ENSG00000218416	-3.0125	1.01409e-68
ENSG00000278921	-2.15415	1.76027e-68
ENSG00000273272	1.93145	2.20172e-68
ENSG00000216895	-2.88414	3.48516e-68
ENSG00000258616	-5.04219	3.64038e-68
ENSG00000245149	1.36656	6.571e-68
ENSG00000285600	1.63985	8.72067e-68
ENSG00000259869	2.57798	1.10449e-66
ENSG00000183470	-2.97847	1.78342e-66
ENSG00000283255	1.82103	2.19333e-66
ENSG00000247324	-2.61024	4.9473e-66
ENSG00000274422	-2.8424	5.07187e-66
ENSG00000238291	1.90577	8.39e-66
ENSG00000198491	-3.2649	8.75231e-66
ENSG00000230825	-3.83564	2.02819e-65
ENSG00000261327	2.32394	5.38063e-65
ENSG00000253706	3.50896	5.7465e-65
ENSG00000234791	-1.28515	6.21108e-65
ENSG00000227028	-2.46698	7.30971e-65
ENSG00000244040	-2.81906	9.93595e-65
ENSG00000230248	-3.71372	1.39034e-64
ENSG00000250341	-2.38868	1.94636e-64
ENSG00000234779	-2.19305	3.91438e-64
ENSG00000225867	-2.54121	6.6937e-64
ENSG00000280711	1.24383	1.84088e-63
ENSG00000277128	2.86088	2.10555e-63
ENSG00000206567	-1.99176	3.27769e-63
ENSG00000203709	-2.2188	3.3657e-63
ENSG00000219159	-1.67867	4.88975e-63
ENSG00000237560	-2.4538	7.9926e-63
ENSG00000259213	-3.37932	3.48489e-62
ENSG00000283294	1.72995	9.76432e-62
ENSG00000267750	1.2482	1.66003e-61
ENSG00000231496	-2.26387	1.8869e-61
ENSG00000230454	-2.66237	3.09548e-61
ENSG00000257636	2.70883	5.15254e-61
ENSG00000256218	-2.28727	9.48453e-61
ENSG00000226363	2.36715	1.20698e-60
ENSG00000280416	-1.88317	1.24848e-60
ENSG00000223999	-2.79402	2.49754e-60
ENSG00000177112	-1.53741	3.1284e-60
ENSG00000262152	1.14482	3.44904e-60
ENSG00000226051	-3.02213	3.97547e-60
ENSG00000237978	2.44184	6.00413e-60
ENSG00000237424	1.62287	1.13502e-59
ENSG00000237290	2.07192	6.07804e-59
ENSG00000236212	3.05819	1.14332e-58
ENSG00000231324	-3.19533	1.32475e-58
ENSG00000233271	-1.8384	1.5126e-58
ENSG00000258548	2.55767	2.81593e-58
ENSG00000231863	-2.29915	3.42145e-58
ENSG00000226649	-2.65331	4.25637e-58
ENSG00000232233	1.53791	3.84113e-57
ENSG00000283737	1.70599	4.61068e-57
ENSG00000203987	-2.56574	6.77775e-57
ENSG00000280604	-2.29917	1.02956e-56
ENSG00000256152	-1.30437	1.40604e-56
ENSG00000260455	1.63271	1.49616e-56
ENSG00000249743	-2.12448	1.62058e-56
ENSG00000222017	2.41702	2.22533e-56
ENSG00000260461	-1.38586	5.92393e-56
ENSG00000224535	1.44025	8.80387e-56
ENSG00000239205	1.33359	1.11482e-55
ENSG00000240240	-1.96963	1.40874e-55
ENSG00000254258	1.49329	1.55585e-55
ENSG00000249082	-3.01667	1.7545e-55
ENSG00000228952	2.06062	2.22826e-55
ENSG00000281097	-3.23239	5.17035e-55
ENSG00000227712	-2.85518	1.87843e-54
ENSG00000251679	1.4603	3.29796e-54
ENSG00000135605	-1.92623	3.99979e-54
ENSG00000253174	1.60373	5.53617e-54
ENSG00000249690	-1.62881	1.24179e-53
ENSG00000251376	1.43583	1.26995e-53
ENSG00000177553	-2.43288	1.28646e-53
ENSG00000224843	1.656	1.57181e-53
ENSG00000234478	-2.11096	2.06333e-53
ENSG00000240350	1.17369	2.82065e-53
ENSG00000234072	1.5577	4.09393e-53
ENSG00000284634	1.33202	5.08979e-53
ENSG00000214614	-3.52591	5.65624e-53
ENSG00000279534	-1.19444	5.73321e-53
ENSG00000261009	-3.91328	6.00169e-53
ENSG00000233854	2.07814	8.04602e-53
ENSG00000231806	1.53869	1.01335e-52
ENSG00000248740	2.68784	1.08348e-52
ENSG00000167046	-3.34218	1.21139e-52
ENSG00000271936	1.21562	2.77791e-52
ENSG00000240893	2.80189	2.9789e-52
ENSG00000236173	1.12212	3.60165e-52
ENSG00000237975	-1.97411	5.56446e-52
ENSG00000245466	-1.98577	9.56418e-52
ENSG00000272168	1.52877	1.93724e-51
ENSG00000168746	1.28716	2.15368e-51
ENSG00000249614	1.46907	4.07435e-51
ENSG00000232023	2.70743	4.37487e-51
ENSG00000229891	-1.89318	4.49618e-51
ENSG00000232140	-1.53174	8.68209e-51
ENSG00000255774	-1.82346	1.63402e-50
ENSG00000259380	1.41609	1.81037e-50
ENSG00000248309	-1.65365	1.92619e-50
ENSG00000242317	-3.1318	1.9605e-50
ENSG00000285536	-1.66022	2.42697e-50
ENSG00000272508	-1.486	2.73856e-50
ENSG00000226562	-1.05613	3.62367e-50
ENSG00000236347	3.2084	3.86929e-50
ENSG00000242049	1.3269	6.91047e-50
ENSG00000198496	-1.23191	8.92565e-50
ENSG00000279417	1.49535	9.63203e-50
ENSG00000232164	1.32037	9.94494e-50
ENSG00000232328	-1.86925	1.48648e-49
ENSG00000267123	2.8325	1.78013e-49
ENSG00000257958	-1.26856	1.84088e-49
ENSG00000238012	-1.66896	1.91511e-49
ENSG00000279774	-1.66552	2.31503e-49
ENSG00000223947	-1.4482	2.53853e-49
ENSG00000204706	-1.6546	2.54817e-49
ENSG00000231419	-1.31212	2.54817e-49
ENSG00000227959	-1.68124	4.88651e-49
ENSG00000250742	-1.22943	6.38627e-49
ENSG00000237689	-1.44365	6.38627e-49
ENSG00000232756	-1.96812	6.83944e-49
ENSG00000227042	-1.52684	9.73782e-49
ENSG00000278709	1.79845	1.31073e-48
ENSG00000270059	-1.19916	1.3772e-48
ENSG00000260072	1.09905	2.68042e-48
ENSG00000233871	-1.64374	3.92205e-48
ENSG00000232555	1.36667	4.08696e-48
ENSG00000227681	-2.21603	4.21462e-48
ENSG00000177340	-1.55723	5.65326e-48
ENSG00000229647	1.45234	5.71754e-48
ENSG00000205913	-2.42168	6.24437e-48
ENSG00000203804	-1.70335	6.81699e-48
ENSG00000236627	1.71621	7.54469e-48
ENSG00000272489	-1.01924	1.17449e-47
ENSG00000231674	-1.45531	1.59623e-47
ENSG00000235140	-1.35508	1.73203e-47
ENSG00000229611	-1.18727	2.10639e-47
ENSG00000236373	-1.64401	2.28852e-47
ENSG00000253103	1.38263	2.34719e-47
ENSG00000224307	-1.48794	2.79512e-47
ENSG00000229613	-1.37346	2.90458e-47
ENSG00000249405	-1.57938	3.67151e-47
ENSG00000239216	1.3775	4.5967e-47
ENSG00000272736	-1.85397	6.01101e-47
ENSG00000218109	-1.18005	6.25312e-47
ENSG00000259357	1.04907	7.07362e-47
ENSG00000277476	-1.12541	8.78018e-47
ENSG00000279227	1.08092	1.04075e-46
ENSG00000225548	2.38932	1.11689e-46
ENSG00000261720	-1.57835	2.8871e-46
ENSG00000182912	2.03898	3.31777e-46
ENSG00000224933	-1.05251	4.69697e-46
ENSG00000272456	-1.72498	9.33287e-46
ENSG00000260970	-1.7881	1.4609e-45
ENSG00000273213	1.14963	2.45026e-45
ENSG00000256508	-2.06373	2.63093e-45
ENSG00000223989	-1.17433	2.86733e-45
ENSG00000279907	-1.20345	2.90102e-45
ENSG00000083622	-1.74047	3.06931e-45
ENSG00000242147	2.53689	4.40348e-45
ENSG00000240040	-1.90029	5.58588e-45
ENSG00000124915	-1.79261	8.3435e-45
ENSG00000250920	3.53938	9.61277e-45
ENSG00000254349	1.57712	1.10504e-44
ENSG00000264956	-1.39256	1.16055e-44
ENSG00000248172	-1.88556	1.74956e-44
ENSG00000240086	2.72227	1.74956e-44
ENSG00000237699	-1.45719	1.81788e-44
ENSG00000248779	-1.18285	1.88657e-44
ENSG00000231764	1.7088	2.5282e-44
ENSG00000258711	1.21216	2.53004e-44
ENSG00000205356	-1.03583	4.88566e-44
ENSG00000265125	-1.06134	4.96493e-44
ENSG00000261538	-1.00106	6.90783e-44
ENSG00000226856	-1.44378	1.05962e-43
ENSG00000177822	2.63295	1.09675e-43
ENSG00000255145	-1.01672	1.23114e-43
ENSG00000279725	-2.43751	1.26991e-43
ENSG00000230438	-1.50467	1.47674e-43
ENSG00000280160	1.18634	1.52444e-43
ENSG00000249731	1.19738	1.65969e-43
ENSG00000227634	-1.23861	1.99542e-43
ENSG00000233354	-1.41395	2.13918e-43
ENSG00000233079	1.19572	2.99724e-43
ENSG00000251432	-1.11531	3.55713e-43
ENSG00000267013	2.40781	3.6919e-43
ENSG00000282885	-1.27359	4.67127e-43
ENSG00000250385	-1.28247	5.07593e-43
ENSG00000228742	2.19403	1.03393e-42
ENSG00000227925	1.73583	1.2357e-42
ENSG00000257985	-1.03429	1.74476e-42
ENSG00000233332	-2.36517	1.76212e-42
ENSG00000250340	-2.098	1.77577e-42
ENSG00000237152	1.16135	2.68544e-42
ENSG00000262001	1.43064	2.74014e-42
ENSG00000257682	1.5737	2.80783e-42
ENSG00000226426	-1.06196	2.89246e-42
ENSG00000254721	1.7615	3.97193e-42
ENSG00000259807	-1.62876	4.33653e-42
ENSG00000248432	1.30396	5.30084e-42
ENSG00000274628	-1.88613	5.70641e-42
ENSG00000280551	-1.4011	6.575e-42
ENSG00000228741	1.22748	7.02202e-42
ENSG00000261520	-2.48381	7.0578e-42
ENSG00000236204	1.04076	7.3868e-42
ENSG00000267761	-1.4883	8.82645e-42
ENSG00000256442	1.10915	1.16229e-41
ENSG00000215386	-1.60725	1.20011e-41
ENSG00000283554	1.63333	1.35943e-41
ENSG00000240063	-1.58092	1.47216e-41
ENSG00000235043	-1.15503	1.55771e-41
ENSG00000230817	1.02671	1.781e-41
ENSG00000236780	-1.4757	2.07639e-41
ENSG00000254123	1.10997	2.12188e-41
ENSG00000259523	-1.06056	2.18993e-41
ENSG00000232243	2.78037	4.46012e-41
ENSG00000251185	1.86005	4.95686e-41
ENSG00000256417	1.97574	5.94949e-41
ENSG00000237457	1.83109	6.1905e-41
ENSG00000232021	1.38562	6.7435e-41
ENSG00000259291	-1.01067	1.08376e-40
ENSG00000268941	1.05046	1.27403e-40
ENSG00000267302	-1.56433	1.57204e-40
ENSG00000273432	-1.30153	1.94996e-40
ENSG00000225778	-1.06343	2.03395e-40
ENSG00000224842	1.46889	2.29968e-40
ENSG00000263724	1.15024	2.58946e-40
ENSG00000233093	-2.05563	2.6114e-40
ENSG00000257808	-1.05212	3.00715e-40
ENSG00000259459	-1.69248	3.10604e-40
ENSG00000229434	-1.83019	3.35188e-40
ENSG00000272686	-1.24268	4.11908e-40
ENSG00000285517	1.2982	9.55975e-40
ENSG00000225012	-1.69588	9.67762e-40
ENSG00000224905	-1.71005	1.20346e-39
ENSG00000272328	1.97937	1.42398e-39
ENSG00000225974	-1.00783	1.73526e-39
ENSG00000236427	-2.50707	1.9441e-39
ENSG00000246889	1.72081	2.10232e-39
ENSG00000243089	1.00351	2.16275e-39
ENSG00000259644	-1.39832	2.78849e-39
ENSG00000205861	-1.06802	3.05112e-39
ENSG00000267454	-1.11296	3.05112e-39
ENSG00000235385	3.10607	3.13116e-39
ENSG00000246100	-1.62394	3.27917e-39
ENSG00000257431	-1.15987	3.9186e-39
ENSG00000224621	-1.69643	4.60619e-39
ENSG00000230316	2.90564	6.1445e-39
ENSG00000257151	-1.96992	6.5314e-39
ENSG00000257219	1.59148	6.88667e-39
ENSG00000225087	3.27093	6.95303e-39
ENSG00000267325	1.3316	7.87734e-39
ENSG00000233452	-1.67578	9.58236e-39
ENSG00000250842	-1.02866	1.3535e-38
ENSG00000224876	-1.40737	1.35478e-38
ENSG00000253669	1.05055	1.47472e-38
ENSG00000228109	1.31475	1.49292e-38
ENSG00000251602	1.08778	2.60936e-38
ENSG00000251536	-1.34447	2.61691e-38
ENSG00000226644	-1.51241	2.71229e-38
ENSG00000280237	-2.34923	2.92245e-38
ENSG00000274461	1.33206	3.04376e-38
ENSG00000206129	1.74301	3.06253e-38
ENSG00000246375	-1.07277	5.00418e-38
ENSG00000273356	-1.2898	5.54393e-38
ENSG00000226031	-1.36442	5.87553e-38
ENSG00000258077	-2.39471	5.8865e-38
ENSG00000233517	-1.1094	6.2265e-38
ENSG00000226519	-2.13281	8.21124e-38
ENSG00000247867	-1.21883	9.42722e-38
ENSG00000233529	-1.38892	9.69818e-38
ENSG00000213468	1.3895	1.96865e-37
ENSG00000249797	-1.46421	2.45785e-37
ENSG00000279499	-1.05385	2.89366e-37
ENSG00000230526	1.51015	3.57722e-37
ENSG00000226079	-1.04663	3.70533e-37
ENSG00000226825	-1.05308	3.80683e-37
ENSG00000279192	-1.6995	4.60813e-37
ENSG00000214999	1.45682	5.29645e-37
ENSG00000183206	1.16651	6.45021e-37
ENSG00000214546	-1.36313	6.67016e-37
ENSG00000232803	-2.02965	8.70235e-37
ENSG00000250081	1.01506	9.22847e-37
ENSG00000250831	-1.30504	9.63775e-37
ENSG00000273062	-1.00019	1.02109e-36
ENSG00000178734	-1.43609	1.30672e-36
ENSG00000266729	-2.21828	1.32564e-36
ENSG00000242190	1.03634	1.4892e-36
ENSG00000247011	-1.3052	1.49697e-36
ENSG00000233682	1.17634	1.54768e-36
ENSG00000254109	-1.0149	1.56527e-36
ENSG00000251281	2.32837	1.56903e-36
ENSG00000249898	-1.43696	1.62162e-36
ENSG00000225684	1.35664	1.90652e-36
ENSG00000258655	-1.39646	2.31605e-36
ENSG00000260992	-1.42757	3.35774e-36
ENSG00000240990	1.93035	3.90245e-36
ENSG00000237949	-1.25319	4.08624e-36
ENSG00000224397	1.22117	4.19523e-36
ENSG00000223749	1.13709	4.60589e-36
ENSG00000230205	-1.15675	5.6076e-36
ENSG00000236494	-1.55099	7.205e-36
ENSG00000231535	-2.49854	7.34546e-36
ENSG00000241220	1.07519	7.83302e-36
ENSG00000254560	2.02685	7.86951e-36
ENSG00000229970	-1.62539	8.87351e-36
ENSG00000230587	-1.51054	1.22534e-35
ENSG00000248112	1.96834	1.35673e-35
ENSG00000279117	-1.42799	1.48935e-35
ENSG00000256642	-1.04189	1.49525e-35
ENSG00000261268	-2.18098	1.93604e-35
ENSG00000229876	1.32757	2.32013e-35
ENSG00000227964	1.59047	2.35244e-35
ENSG00000227482	1.02913	2.50804e-35
ENSG00000236324	-1.14001	4.15279e-35
ENSG00000279773	1.71626	4.83826e-35
ENSG00000230628	-1.28431	5.38491e-35
ENSG00000245812	-1.04312	6.91538e-35
ENSG00000241213	-1.25616	7.5062e-35
ENSG00000236883	-1.56372	7.74637e-35
ENSG00000233515	1.41488	9.92536e-35
ENSG00000197085	1.46714	1.23262e-34
ENSG00000257894	1.09484	1.29005e-34
ENSG00000267506	-1.81942	1.70264e-34
ENSG00000262468	1.00937	2.01403e-34
ENSG00000283458	-1.88993	2.76322e-34
ENSG00000283122	-1.18524	3.60925e-34
ENSG00000279172	-1.17367	4.49193e-34
ENSG00000279739	1.6029	5.31726e-34
ENSG00000269994	1.85107	5.33809e-34
ENSG00000203721	1.70872	1.06153e-33
ENSG00000223400	-1.0308	1.24032e-33
ENSG00000239552	-1.32152	1.57073e-33
ENSG00000233882	1.02558	1.92106e-33
ENSG00000225877	1.54139	1.93726e-33
ENSG00000247809	-1.10477	2.10824e-33
ENSG00000189229	2.3733	2.20571e-33
ENSG00000229847	-1.85654	2.74133e-33
ENSG00000261863	-1.42642	3.22559e-33
ENSG00000227220	-1.09126	3.33882e-33
ENSG00000214719	-1.23237	3.33917e-33
ENSG00000229321	-1.07693	3.44203e-33
ENSG00000235947	-1.40181	3.80194e-33
ENSG00000278338	1.87391	4.28889e-33
ENSG00000250041	1.1854	4.40979e-33
ENSG00000260926	1.10547	4.40979e-33
ENSG00000227091	-1.2973	5.67359e-33
ENSG00000268388	-1.19284	5.81966e-33
ENSG00000237605	1.16786	6.45259e-33
ENSG00000231131	1.20185	7.49597e-33
ENSG00000224090	-1.4281	8.31389e-33
ENSG00000246228	1.36696	1.00147e-32
ENSG00000262061	-1.68163	1.18026e-32
ENSG00000225044	1.01697	1.34894e-32
ENSG00000228488	-1.20522	1.63804e-32
ENSG00000264404	1.06961	1.85483e-32
ENSG00000274956	-1.1678	2.39605e-32
ENSG00000251676	-1.47028	2.79546e-32
ENSG00000250958	-1.84995	3.24814e-32
ENSG00000256204	-1.19147	3.49256e-32
ENSG00000237853	-1.11429	3.65451e-32
ENSG00000204814	-1.13105	3.81024e-32
ENSG00000229297	-1.05106	3.95521e-32
ENSG00000226762	-1.48557	4.9331e-32
ENSG00000235939	-1.425	6.70499e-32
ENSG00000278899	-1.12053	7.05083e-32
ENSG00000229334	1.25358	7.80705e-32
ENSG00000253199	-1.31495	1.64437e-31
ENSG00000257595	-1.20195	2.23015e-31
ENSG00000272259	-1.59856	2.37687e-31
ENSG00000267313	2.08378	2.52605e-31
ENSG00000242136	-1.20174	2.54075e-31
ENSG00000249252	-1.53029	3.4824e-31
ENSG00000233864	-1.25646	3.50576e-31
ENSG00000236901	-1.19677	3.773e-31
ENSG00000251555	-1.21196	5.07034e-31
ENSG00000254080	1.00761	5.93232e-31
ENSG00000229177	-1.64654	5.93232e-31
ENSG00000229619	-1.12784	5.95686e-31
ENSG00000269072	1.05316	6.15951e-31
ENSG00000233968	-1.25138	6.33337e-31
ENSG00000278740	-1.02481	8.02156e-31
ENSG00000261083	-1.19191	9.98224e-31
ENSG00000226251	-2.10235	1.30906e-30
ENSG00000270544	-1.06488	1.73286e-30
ENSG00000227036	1.02906	2.24924e-30
ENSG00000236404	-1.53126	2.31518e-30
ENSG00000229243	1.085	2.93954e-30
ENSG00000284646	-1.62139	3.92999e-30
ENSG00000163364	1.30265	4.26137e-30
ENSG00000257114	1.36572	4.49922e-30
ENSG00000250564	1.62163	4.873e-30
ENSG00000214708	-1.46876	5.77915e-30
ENSG00000249102	1.66836	6.7765e-30
ENSG00000263812	-1.16599	7.92182e-30
ENSG00000243961	1.36088	8.85957e-30
ENSG00000153363	1.03806	1.25583e-29
ENSG00000271826	1.47921	1.37854e-29
ENSG00000226250	1.26185	2.07853e-29
ENSG00000249669	-1.3838	2.5488e-29
ENSG00000280294	-1.16337	2.79845e-29
ENSG00000243550	-1.90991	3.3022e-29
ENSG00000235126	1.13279	6.31386e-29
ENSG00000233844	1.44024	1.05075e-28
ENSG00000284606	-1.28899	1.61165e-28
ENSG00000226819	-1.09551	1.75223e-28
ENSG00000234928	-2.11228	1.81589e-28
ENSG00000261780	2.28868	2.01935e-28
ENSG00000258754	-1.00359	2.19955e-28
ENSG00000224711	-1.21485	2.29375e-28
ENSG00000258018	1.03788	2.34074e-28
ENSG00000236700	1.4515	3.31329e-28
ENSG00000258808	-1.72357	3.65297e-28
ENSG00000248576	-1.03051	3.66115e-28
ENSG00000234572	-2.21645	3.89736e-28
ENSG00000253455	-1.46813	6.95242e-28
ENSG00000234362	1.4482	7.24502e-28
ENSG00000226374	-1.62242	7.80298e-28
ENSG00000271830	1.74938	8.6592e-28
ENSG00000233746	-1.05923	8.92955e-28
ENSG00000214145	-1.73591	9.07269e-28
ENSG00000224957	-1.14329	9.09963e-28
ENSG00000227496	1.23268	9.98118e-28
ENSG00000266977	1.11759	1.08842e-27
ENSG00000226249	-1.03578	1.13154e-27
ENSG00000225833	-1.65124	1.19787e-27
ENSG00000217825	-1.60282	1.57675e-27
ENSG00000229967	1.49311	1.81016e-27
ENSG00000249378	1.3445	1.85505e-27
ENSG00000234311	-1.29775	2.97129e-27
ENSG00000280693	-1.56578	3.79412e-27
ENSG00000267577	1.5878	3.99046e-27
ENSG00000239482	-1.21322	5.32585e-27
ENSG00000239930	-1.07096	5.3816e-27
ENSG00000246095	1.26576	6.29836e-27
ENSG00000256802	1.60841	7.1673e-27
ENSG00000231770	1.00399	9.58714e-27
ENSG00000254510	-1.2963	1.31596e-26
ENSG00000269220	-1.41414	1.5052e-26
ENSG00000225649	-1.07318	1.61547e-26
ENSG00000231421	1.27941	2.02349e-26
ENSG00000237940	-1.11352	2.70762e-26
ENSG00000237179	-1.06135	2.91509e-26
ENSG00000261241	1.3633	3.50497e-26
ENSG00000222022	1.25987	4.85822e-26
ENSG00000228630	1.85275	6.41303e-26
ENSG00000228661	-1.03036	8.16529e-26
ENSG00000271643	-1.06243	1.29388e-25
ENSG00000099869	1.50027	1.72362e-25
ENSG00000234184	-1.66579	1.76304e-25
ENSG00000277693	1.37509	1.80711e-25
ENSG00000284837	-1.52457	2.07027e-25
ENSG00000234352	2.44461	2.59373e-25
ENSG00000273032	-1.17513	2.61278e-25
ENSG00000270547	1.59223	2.74669e-25
ENSG00000228541	-1.25261	3.22654e-25
ENSG00000285278	1.02555	3.94315e-25
ENSG00000231212	-1.04495	7.14962e-25
ENSG00000249171	1.07385	8.14551e-25
ENSG00000246130	1.16937	1.33602e-24
ENSG00000224899	1.49303	1.63708e-24
ENSG00000271856	-1.53533	1.87809e-24
ENSG00000251412	-1.72531	1.96187e-24
ENSG00000246876	1.89842	2.21155e-24
ENSG00000225826	1.34372	2.98687e-24
ENSG00000238266	2.01176	4.6841e-24
ENSG00000231141	-1.08356	5.00653e-24
ENSG00000258791	1.78374	1.94524e-23
ENSG00000225255	1.69255	3.21485e-23
ENSG00000227674	1.20496	4.32456e-23
ENSG00000223872	1.1602	4.70667e-23
ENSG00000259062	1.09587	5.88663e-23
ENSG00000234456	-1.02723	6.16885e-23
ENSG00000233725	-1.6562	6.22288e-23
ENSG00000244321	1.19821	6.22776e-23
ENSG00000253417	1.04053	6.76247e-23
ENSG00000229722	1.06518	8.77813e-23
ENSG00000237311	-1.51413	9.06133e-23
ENSG00000236039	1.42827	9.24421e-23
ENSG00000247993	1.29837	9.62197e-23
ENSG00000227640	-1.39219	1.09964e-22
ENSG00000253633	1.25042	1.36272e-22
ENSG00000229312	1.75584	1.61481e-22
ENSG00000253140	-1.24948	1.77118e-22
ENSG00000226965	1.00322	1.99626e-22
ENSG00000231648	1.15872	2.0532e-22
ENSG00000255248	-1.13509	2.4109e-22
ENSG00000279675	-1.47151	2.53556e-22
ENSG00000259107	1.67695	2.56156e-22
ENSG00000249551	-1.37028	4.21346e-22
ENSG00000235584	1.5472	4.66017e-22
ENSG00000253898	1.5935	5.79272e-22
ENSG00000230393	-1.0367	6.32968e-22
ENSG00000266897	-1.38981	9.47039e-22
ENSG00000232448	1.10009	1.09389e-21
ENSG00000230803	1.28573	1.09399e-21
ENSG00000238755	-1.33238	2.222e-21
ENSG00000229494	1.1153	3.40043e-21
ENSG00000259485	1.12529	3.83925e-21
ENSG00000255240	-1.0232	5.21548e-21
ENSG00000266983	-1.2043	8.54249e-21
ENSG00000236751	-1.3307	9.74713e-21
ENSG00000255267	1.42142	1.27751e-20
ENSG00000272079	-1.21641	1.62753e-20
ENSG00000248323	1.0436	1.82458e-20
ENSG00000234571	-1.10158	4.01161e-20
ENSG00000237499	-1.58787	5.49095e-20
ENSG00000256084	1.09039	8.04797e-20
ENSG00000267057	1.35729	1.06084e-19
ENSG00000230030	-1.18226	1.27936e-19
ENSG00000226674	1.15968	1.53788e-19
ENSG00000249307	-1.07962	1.6364e-19
ENSG00000228295	1.29117	1.67498e-19
ENSG00000232006	1.08844	3.81184e-19
ENSG00000250735	1.42507	5.39275e-19
ENSG00000233532	1.5841	5.84711e-19
ENSG00000249981	1.04244	6.52859e-19
ENSG00000234753	1.02629	6.7353e-19
ENSG00000249116	1.19132	1.3341e-18
ENSG00000233029	-1.01991	1.50117e-18
ENSG00000237735	1.26507	3.72161e-18
ENSG00000254854	1.02361	4.59816e-18
ENSG00000240476	1.00944	4.77938e-18
ENSG00000258700	1.15623	5.56243e-18
ENSG00000231532	1.51847	6.88701e-18
ENSG00000272463	-1.16795	7.40077e-18
ENSG00000244358	-1.25847	1.00165e-17
ENSG00000235357	-1.06981	1.1823e-17
ENSG00000234840	-1.40102	1.22281e-17
ENSG00000255404	-1.53325	1.71861e-17
ENSG00000233098	1.72497	3.12903e-17
ENSG00000261069	-1.20563	3.74862e-17
ENSG00000246859	1.21776	8.15173e-17
ENSG00000285887	1.03045	8.18822e-17
ENSG00000130600	1.36388	1.26231e-16
ENSG00000237361	-1.25831	1.44936e-16
ENSG00000258945	1.09878	1.62662e-16
ENSG00000229618	1.13099	4.43455e-16
ENSG00000236389	1.01744	4.21089e-15
ENSG00000267413	1.2031	7.62136e-15
ENSG00000225329	1.12783	8.75531e-15
ENSG00000228618	1.14796	1.19579e-14
ENSG00000235281	-1.16412	1.66939e-14
ENSG00000248441	1.4132	1.94207e-14
ENSG00000247134	1.2038	3.33638e-14
ENSG00000236740	-1.29807	5.14567e-14
ENSG00000257500	-1.11348	6.79474e-14
ENSG00000251363	1.21642	7.7729e-13
ENSG00000215808	1.15281	1.61846e-12
ENSG00000239587	1.14244	2.03308e-12
ENSG00000237713	1.05092	4.54603e-12
ENSG00000222033	-1.06376	6.69899e-12
ENSG00000196167	-1.32015	9.69808e-12
ENSG00000224853	1.00582	6.00659e-11
ENSG00000251629	1.0809	1.57266e-10
ENSG00000272431	1.2204	8.58929e-10
ENSG00000268621	1.02668	1.28189e-08
ENSG00000265992	1.06565	4.15916e-06
